# Supplementary material for: Cellular Uptake and Toxicological Effects of Differently Sized Zinc Oxide Nanoparticles in Intestinal Cells
Source: MDPI journal article supplement (doi:10.3390/toxics9050096), 2021-04-27
Supplement: s1 [file s1]

# Supplementary Materials: Cellular Uptake and Toxicological Effects of Differently Sized Zinc Oxide Nanoparticles in Intestinal Cells

Anna Mittag, Christian Hoera, Alexander Kämpfe, Martin Westermann, Jochen Kuckelkorn, Thomas Schneider and Michael Gleis

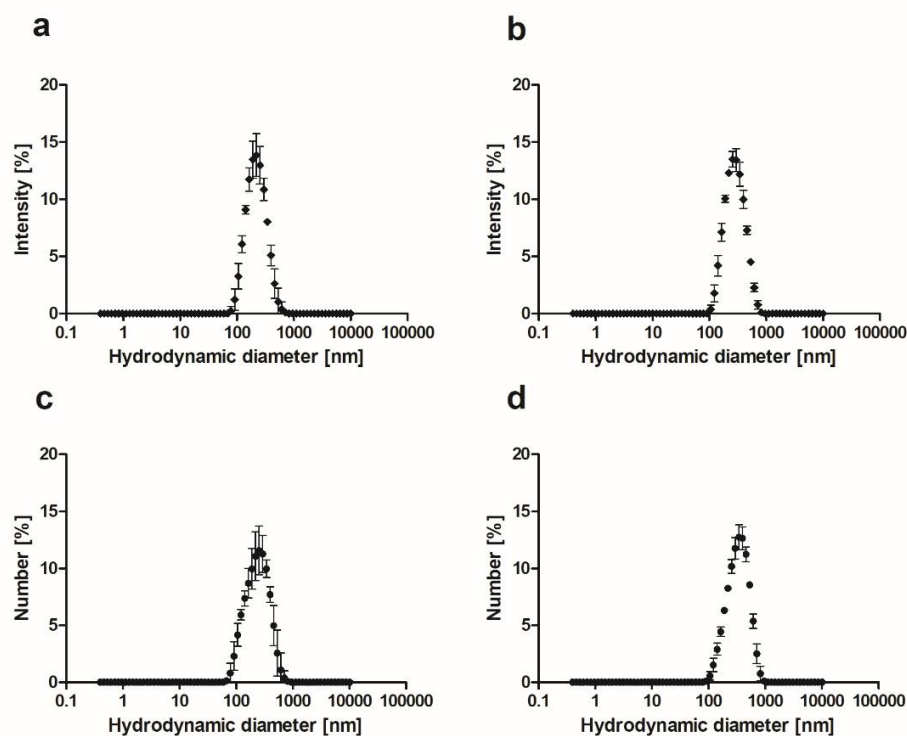

**Figure S1.** Particle size determination by dynamic light scattering. The scattering intensity (a, b) and the number distribution (c, d) of 1229  $\mu\text{mol/l}$  ZnO NP <50 nm (a, c) and 1229  $\mu\text{mol/l}$  ZnO NP <100 nm (b, d) are shown. Data are expressed as mean  $\pm$  standard deviation;  $n = 3$ .

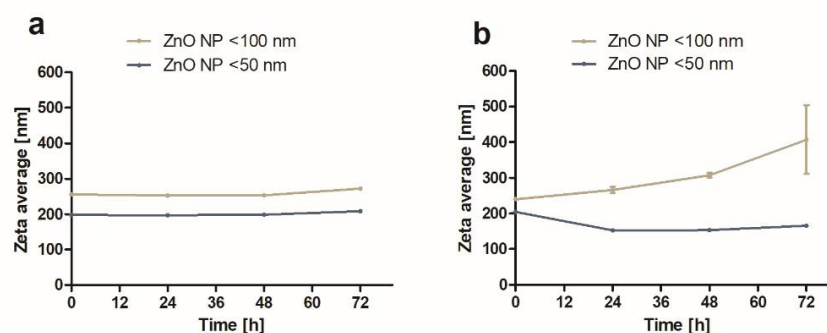

**Figure S2.** Long-term stability of zinc oxide nanoparticle (ZnO NP) dispersions in cell culture medium (a) and water (b) after ultrasonication measured over a period of 72 h. Data are expressed as mean  $\pm$  standard deviation;  $n = 3$ .

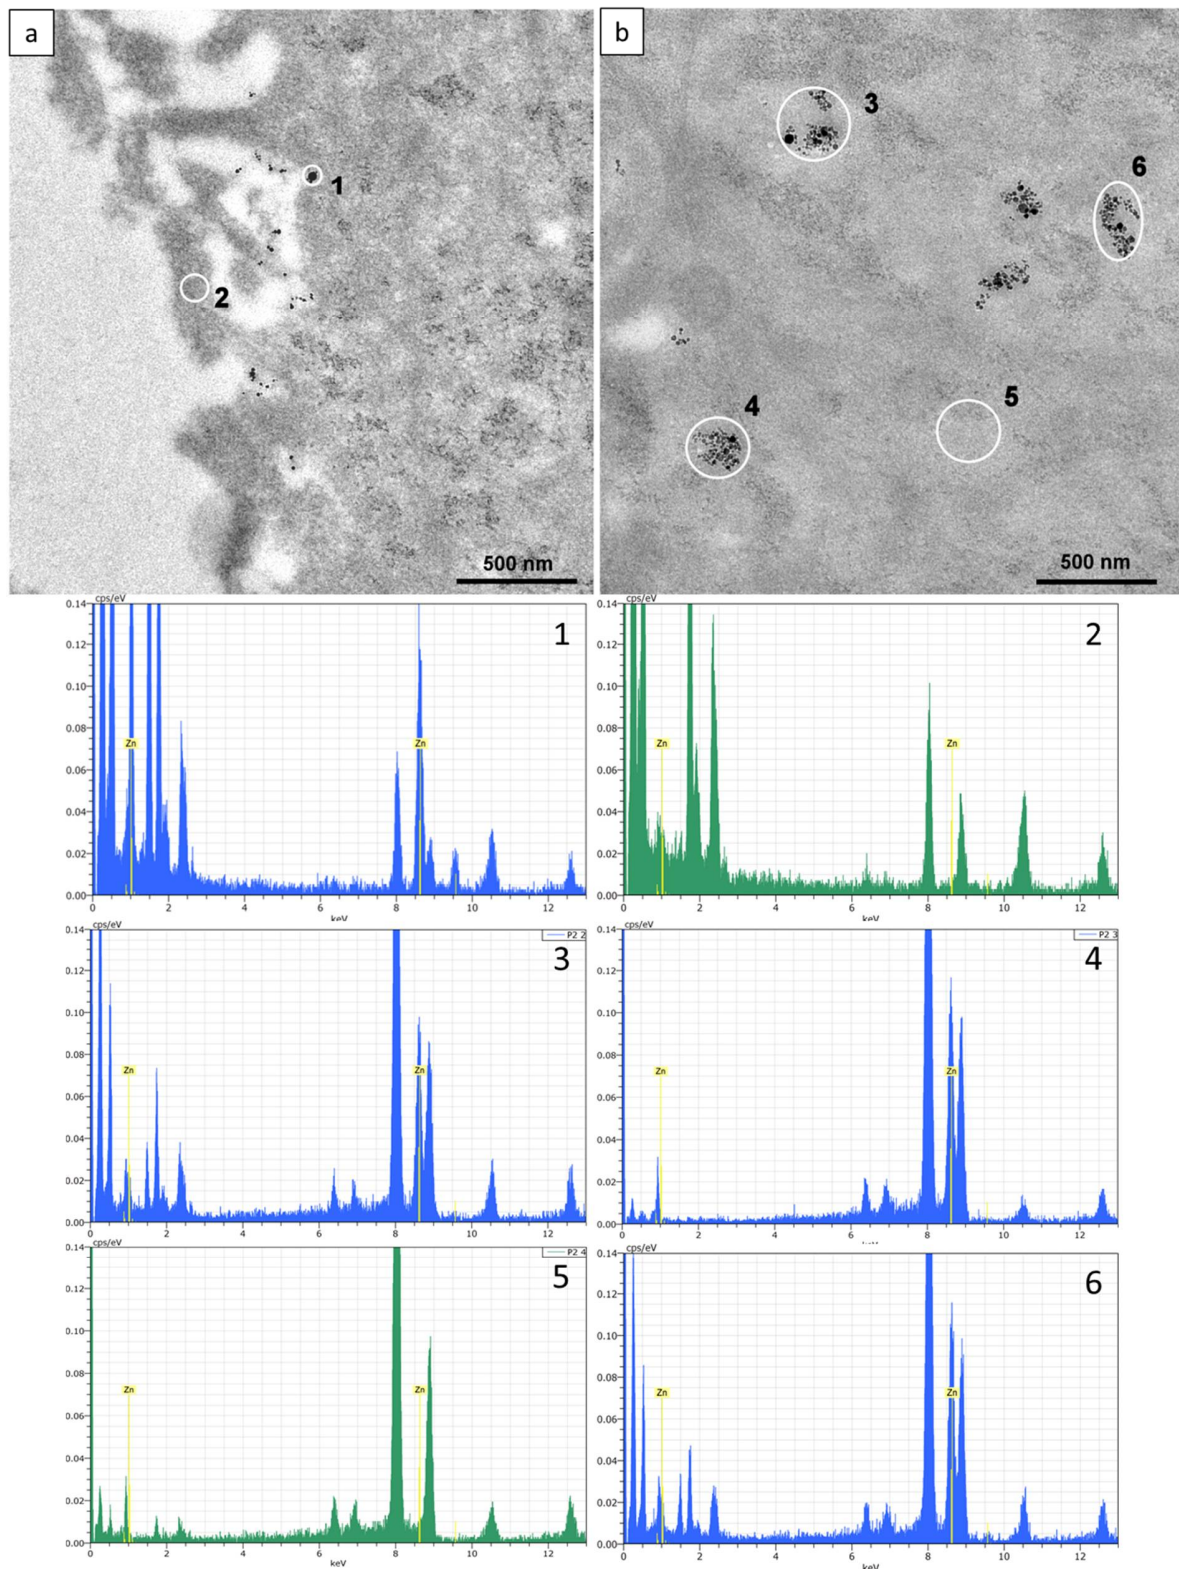

**Figure S3.** TEM images of LT97 cells with ZnO NP <50 nm on the cell surface (a) and inside the cells (b) and EDX analysis of labeled areas with associated spectra (1–6). Blue spectra indicate zinc on particulate structures (peak at 8.63 keV = Zn Kα); green spectra are reference areas without zinc detection; peaks at 8.0 keV = Cu Kα from copper grids.

**Table S1.** EC<sub>50</sub> values of ZnO NP <50 nm, ZnO NP <100 nm and ZnCl<sub>2</sub> corresponding to figures 6–9, separately calculated for each treatment time and cell line; n. d. = not detectable (95% confidence interval in brackets).

| Compound          | Time [h] | EC <sub>50</sub> [μmol/L] |                      |                     |                     |
|-------------------|----------|---------------------------|----------------------|---------------------|---------------------|
|                   |          | Caco-2                    |                      | LT97                |                     |
|                   |          | MTT                       | DAPI                 | MTT                 | DAPI                |
| ZnO NP <50 nm     | 3        | n. d.                     | 1286<br>(958–1874)   | 1028<br>(787–1393)  | n. d.               |
|                   | 6        | 1602<br>(987–3947)        | 656<br>(455–909)     | 698<br>(552–873)    | 727<br>(562–932)    |
|                   | 24       | 509<br>(238–1005)         | 490<br>(298–706)     | 358<br>(190–541)    | 520<br>(320–750)    |
|                   | 48       | 240<br>(219–798)          | 537<br>(261–858)     | 520<br>(368–685)    | 628<br>(471–805)    |
|                   | 72       | 258<br>(251–849)          | 485<br>(190–824)     | 482<br>(327–647)    | 632<br>(476–808)    |
|                   |          |                           |                      |                     |                     |
| ZnO NP <100 nm    | 3        | n. d.                     | 1238<br>(876–1953)   | 1030<br>(767–1447)  | 1391<br>(835–3408)  |
|                   | 6        | 2122<br>(1659–2959)       | 755<br>(562–1006)    | 656<br>(493–852)    | 955<br>(783–1170)   |
|                   | 24       | 548<br>(363–762)          | 515<br>(324–733)     | 418<br>(251–599)    | 772<br>(368–1576)   |
|                   | 48       | 590<br>(349–883)          | 615<br>(387–888)     | 587<br>(452–737)    | 697<br>(549–869)    |
|                   | 72       | 582<br>(364–836)          | 571<br>(357–831)     | 566<br>(431–715)    | 708<br>(562–878)    |
|                   |          |                           |                      |                     |                     |
| ZnCl <sub>2</sub> | 3        | n. d.                     | 7341<br>(5151–13090) | 1554<br>(1007–3210) | 1887<br>(1378–2999) |
|                   | 6        | 1333<br>(1032–1814)       | 2204<br>(1911–2607)  | 520<br>(354–706)    | 638<br>(471–839)    |
|                   | 24       | 467<br>(214–755)          | 527<br>(307–775)     | 401<br>(151–668)    | 506<br>(251–808)    |
|                   | 48       | 506<br>(233–820)          | 539<br>(278–843)     | 439<br>(200–697)    | 509<br>(265–784)    |
|                   | 72       | 532<br>(263–846)          | 483<br>(215–796)     | 379<br>(136–629)    | 513<br>(273–785)    |
|                   |          |                           |                      |                     |                     |

**Table S2.** EC<sub>50</sub> values of ZnO NP <50 nm, ZnO NP <100 nm and ZnCl<sub>2</sub> calculated from real-time cell analysis data for Caco-2 and LT97 cells (95% confidence interval in brackets).

| Compound          | Time [h] | EC <sub>50</sub> [μmol/L] |                   |
|-------------------|----------|---------------------------|-------------------|
|                   |          | Caco-2                    | LT97              |
| ZnO NP <50 nm     | 24       | 1400<br>(712–6339)        | 803<br>(450–1485) |
|                   | 48       | 1059<br>(485–4575)        | 823<br>(377–1987) |
| ZnO NP <100 nm    | 24       | 1111<br>(615–2661)        | 735<br>(313–1660) |
|                   | 48       | 852<br>(372–2239)         | 811<br>(292–2612) |
| ZnCl <sub>2</sub> | 24       | 1051<br>(349–6584)        | 418<br>(55–1019)  |
|                   | 48       | 644<br>(264–1224)         | 558<br>(121–1294) |

**Table S3.** Mutagenicity of ZnO NP and ZnCl<sub>2</sub> in *Salmonella typhimurium* TA100 and TA98 strains with and without S9 activation. Results are presented as mutagenic ratio and are expressed as mean  $\pm$  standard deviation;  $n = 3$ . Significant differences compared to untreated control ( $* p \leq 0.05$ ) were obtained by one-way analysis of variance/Ryan-Einot-Gabriel-Welsh *post hoc* test.

| Compound                     | Dose [ $\mu$ g/plate] | Mutagenic Ratio |                 |                 |                 |
|------------------------------|-----------------------|-----------------|-----------------|-----------------|-----------------|
|                              |                       | TA100           |                 | TA98            |                 |
|                              |                       | without S9      | with S9         | without S9      | with S9         |
| ZnO NP <sub>&lt;50 nm</sub>  | 0.1                   | 1.0 $\pm$ 0.1   | 1.0 $\pm$ 0.1   | 1.1 $\pm$ 0.2   | 1.0 $\pm$ 0.1   |
|                              | 0.25                  | 1.0 $\pm$ 0.1   | 1.0 $\pm$ 0.1   | 0.9 $\pm$ 0.1   | 1.1 $\pm$ 0.1   |
|                              | 0.5                   | 1.0 $\pm$ 0.1   | 1.0 $\pm$ 0.1   | 1.1 $\pm$ 0.1   | 1.3 $\pm$ 0.2   |
|                              | 1                     | 1.0 $\pm$ 0.1   | 1.0 $\pm$ 0.1   | 1.0 $\pm$ 0.1   | 1.2 $\pm$ 0.5   |
|                              | 2.5                   | 0.9 $\pm$ 0.0   | 1.0 $\pm$ 0.0   | 1.0 $\pm$ 0.2   | 1.2 $\pm$ 0.4   |
|                              | 5                     | 1.0 $\pm$ 0.3   | 0.9 $\pm$ 0.1   | 1.0 $\pm$ 0.1   | 1.3 $\pm$ 0.3   |
|                              | 10                    | 1.0 $\pm$ 0.2   | 0.9 $\pm$ 0.1   | 0.9 $\pm$ 0.1   | 1.5 $\pm$ 0.4   |
| ZnO NP <sub>&lt;100 nm</sub> | 0.1                   | 1.0 $\pm$ 0.0   | 1.1 $\pm$ 0.1   | 1.1 $\pm$ 0.2   | 1.1 $\pm$ 0.1   |
|                              | 0.25                  | 1.0 $\pm$ 0.1   | 1.0 $\pm$ 0.1   | 1.0 $\pm$ 0.1   | 1.1 $\pm$ 0.1   |
|                              | 0.5                   | 1.0 $\pm$ 0.1   | 1.0 $\pm$ 0.1   | 1.1 $\pm$ 0.1   | 1.3 $\pm$ 0.3   |
|                              | 1                     | 0.9 $\pm$ 0.0   | 1.0 $\pm$ 0.0   | 1.1 $\pm$ 0.1   | 1.3 $\pm$ 0.6   |
|                              | 2.5                   | 0.9 $\pm$ 0.0   | 1.0 $\pm$ 0.0   | 1.1 $\pm$ 0.2   | 1.3 $\pm$ 0.5   |
|                              | 5                     | 1.0 $\pm$ 0.4   | 0.9 $\pm$ 0.1   | 1.0 $\pm$ 0.0   | 1.5 $\pm$ 0.0   |
|                              | 10                    | 1.0 $\pm$ 0.3   | 1.0 $\pm$ 0.1   | 1.0 $\pm$ 0.1   | 1.7 $\pm$ 0.3   |
| ZnCl <sub>2</sub>            | 17                    | 0.9 $\pm$ 0.1   | 1.0 $\pm$ 0.1   | 0.7 $\pm$ 0.2   | 1.1 $\pm$ 0.2   |
| PC                           |                       | 8.0 $\pm$ 1.1*  | 21.8 $\pm$ 2.1* | 61.4 $\pm$ 2.4* | 26.5 $\pm$ 3.0* |

PC: positive controls (bis(2-chloroethyl)-ammonium chloride for TA100 without S9; 2-aminoanthracene for TA100 with S9; 4,6-dinitro-o-cresol for TA98 without S9; daunomycin for TA98 with S9).
